# Supplementary material for: The ion migration process and cyclic stability of voltage-induced vanadium dioxide phase transition
Source: Royal Society of Chemistry journal article supplement (doi:10.1039/d2tc02668f), 2022-01-01
Supplement: d2tc02668f1.pdf [file d2tc02668f1.pdf]

## Supporting Information

### Ion Migration Process and Cyclic Stability of Voltage-Induced Vanadium Dioxide Phase Transition

*Xiaowei Ji,<sup>ab</sup> Aibin Huang,<sup>b</sup> Hanxiang Jia,<sup>bc</sup> Dazhi Sun,<sup>\*a</sup> Ping Jin<sup>b</sup> and Xun Cao<sup>\*bc</sup>*

<sup>a</sup> College of Chemistry and Materials Science, Shanghai Normal University, Shanghai 200234, China

<sup>b</sup> State Key Laboratory of High Performance Ceramics and Superfine Microstructure, Shanghai Institute of Ceramics, Chinese Academy of Sciences, Shanghai, 200050, China

<sup>c</sup> Center of Materials Science and Optoelectronics Engineering, University of Chinese Academy of Sciences, Beijing 100049, China

#### **\*Corresponding author at**

State Key Laboratory of High Performance Ceramics and Superfine Microstructure, Shanghai Institute of Ceramics, Chinese Academy of Sciences, Shanghai 200050, China

E-mail address: [cxun@mail.sic.ac.cn](mailto:cxun@mail.sic.ac.cn) (**X. Cao**)

College of Chemistry and Materials Science, Shanghai Normal University, Shanghai 200234, China

E-mail address: [sundazhi@shnu.edu.cn](mailto:sundazhi@shnu.edu.cn) (**D. Sun**)

**Table S1**

Transmittance and optical contrast of the colored/bleached state of IV at specific wavelengths.

| Cycles | 670 nm    |            |                    | 2250 nm   |            |                    |
|--------|-----------|------------|--------------------|-----------|------------|--------------------|
|        | Colored/% | Bleached/% | Optical contrast/% | Colored/% | Bleached/% | Optical contrast/% |
| 10     | 49        | 52.7       | 3.7                | 45.6      | 47.6       | 2                  |
| 20     | 50.1      | 53.3       | 3.2                | 45.9      | 48         | 2.1                |
| 30     | 50.3      | 53.3       | 3                  | 47.2      | 48.3       | 1.1                |
| 40     | 51.3      | 57.4       | 6.1                | 45.5      | 47.4       | 1.9                |
| 50     | 52.7      | 62.1       | 9.4                | 48.1      | 50.6       | 2.5                |

**Table S2**

Transmittance and optical contrast of the colored/bleached state of IVL at specific wavelengths.

| Cycles | 670 nm    |            |                    | 2250 nm   |            |                    |
|--------|-----------|------------|--------------------|-----------|------------|--------------------|
|        | Colored/% | Bleached/% | Optical contrast/% | Colored/% | Bleached/% | Optical contrast/% |
| 10     | 49.1      | 49.9       | 0.8                | 59        | 66.66      | 7.66               |
| 20     | 49        | 51.1       | 2.1                | 54        | 68.1       | 14.1               |
| 30     | 48        | 50.4       | 2.4                | 53.4      | 60.5       | 7.1                |
| 40     | 48.4      | 50.3       | 1.9                | 46.5      | 53.2       | 6.7                |
| 50     | 49.3      | 51         | 1.7                | 47.8      | 52.6       | 4.8                |

**Table S3**

Phase change temperature (PCT) and rate of change of IV and IVL at different cycles.

| Cycles | IV     |                  | IVL    |                  |
|--------|--------|------------------|--------|------------------|
|        | PCT/°C | Rate of change/% | PCT/°C | Rate of change/% |
| 0      | 67.59  | /                | 65.59  | /                |
| 10     | 54.84  | 22.14            | 61.81  | 5.76             |
| 20     | 54.36  | 22.96            | 61.51  | 6.22             |
| 30     | 55.37  | 18.08            | 58.06  | 11.48            |
| 40     | 52.09  | 22.93            | 59.43  | 9.39             |
| 50     | 51.59  | 23.67            | 58.68  | 10.53            |

**Table S4**

The offset angles of the (011) diffraction peaks of IV and IVL.

| Cycles | IV     | IVL    |
|--------|--------|--------|
| 0      | 27.89° | 27.89° |
| 1      | 27.86° | 27.84° |
| 10     | 27.75° | 27.76° |
| 30     | 27.63° | 27.73° |
| 50     | /      | 27.68° |

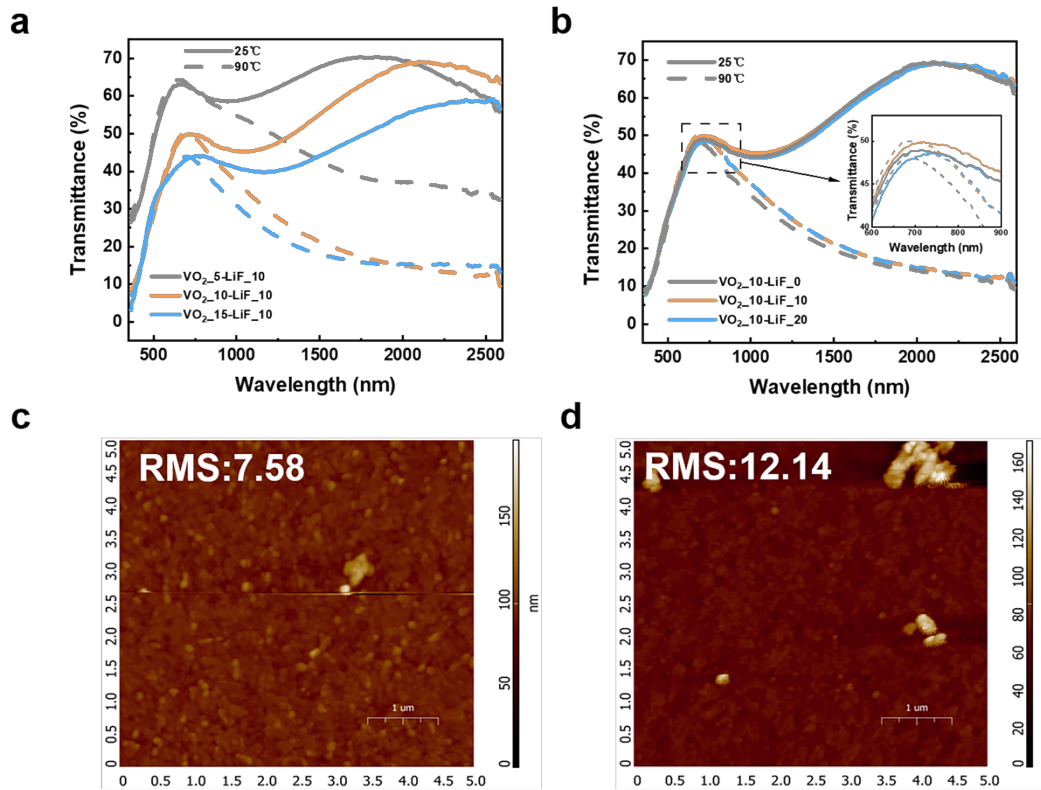

**Fig. S1.** High and low temperature (25°C and 90°C) transmittance spectra of VO<sub>2</sub> and LiF multilayers with different thicknesses: (a) LiF fixed sputtering for 10 min, VO<sub>2</sub> sputtering for 5 min, 10 min and 15 min. (b) VO<sub>2</sub> fixed sputtering for 10 min, LiF sputtering 0 min, 10 min and 20 min, and the illustration is a partial enlarged view. AFM images of (c) VO<sub>2</sub> film and (d) VO<sub>2</sub>/LiF composite film on ITO glass substrate. Both VO<sub>2</sub> and LiF were sputtered for 10 minutes, and the thickness of these films below is the same.

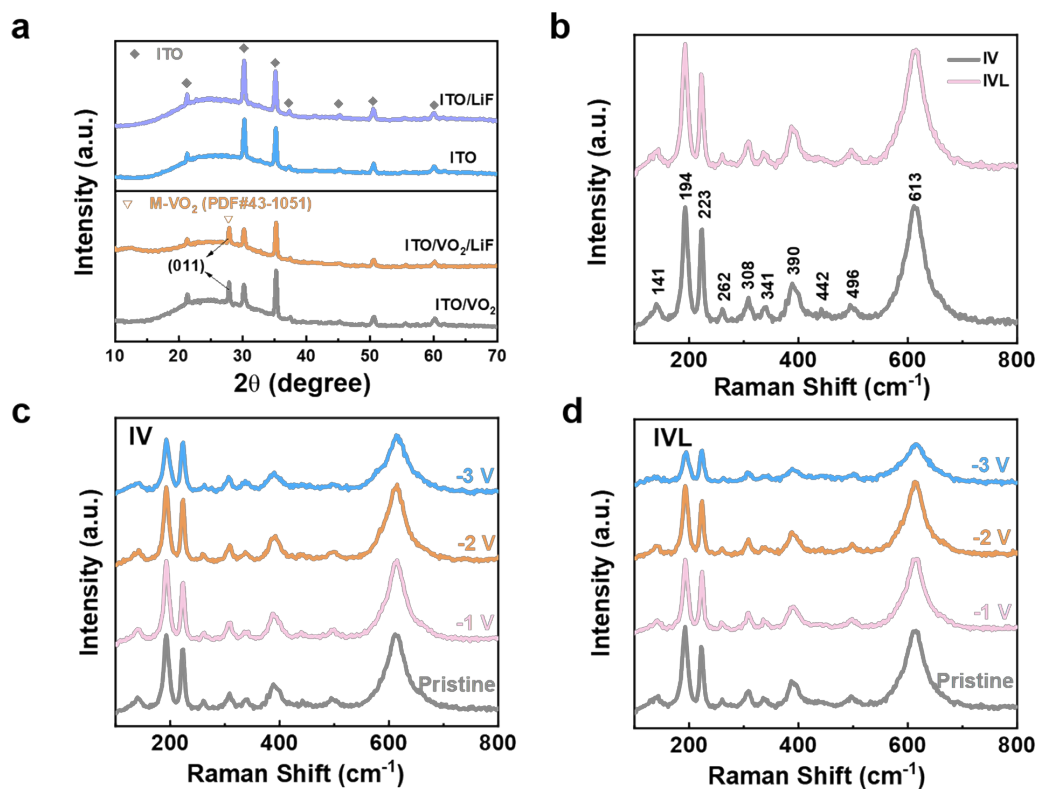

**Fig. S2.** (a) The XRD patterns of the components of the multilayer films and (b) Raman patterns of VO<sub>2</sub> (IV, gray line) and VO<sub>2</sub>/LiF (IVL, blue line) on ITO glass substrates. Raman patterns of (c) IV and (d) IVL when different voltages were applied.

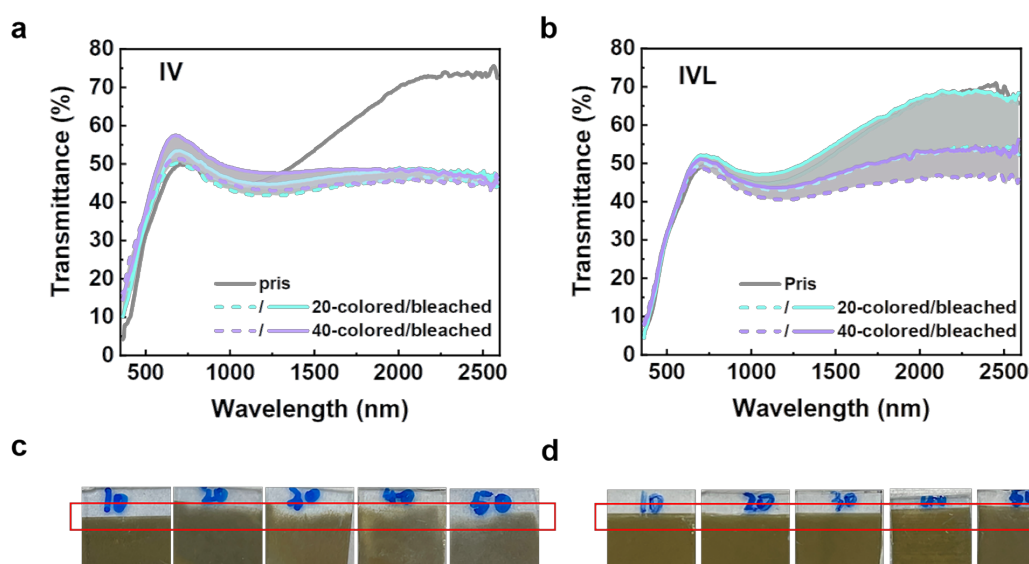

**Fig. S3.** Transmittance spectra of (a) IV and (b) IVL after 20 and 40 cycles; physical images of (c) IV and (d) IVL after 10, 20, 30, 40, and 50 cycles. The cycling voltage was  $\pm 2.5$  V, and each voltage was maintained for 1 min.

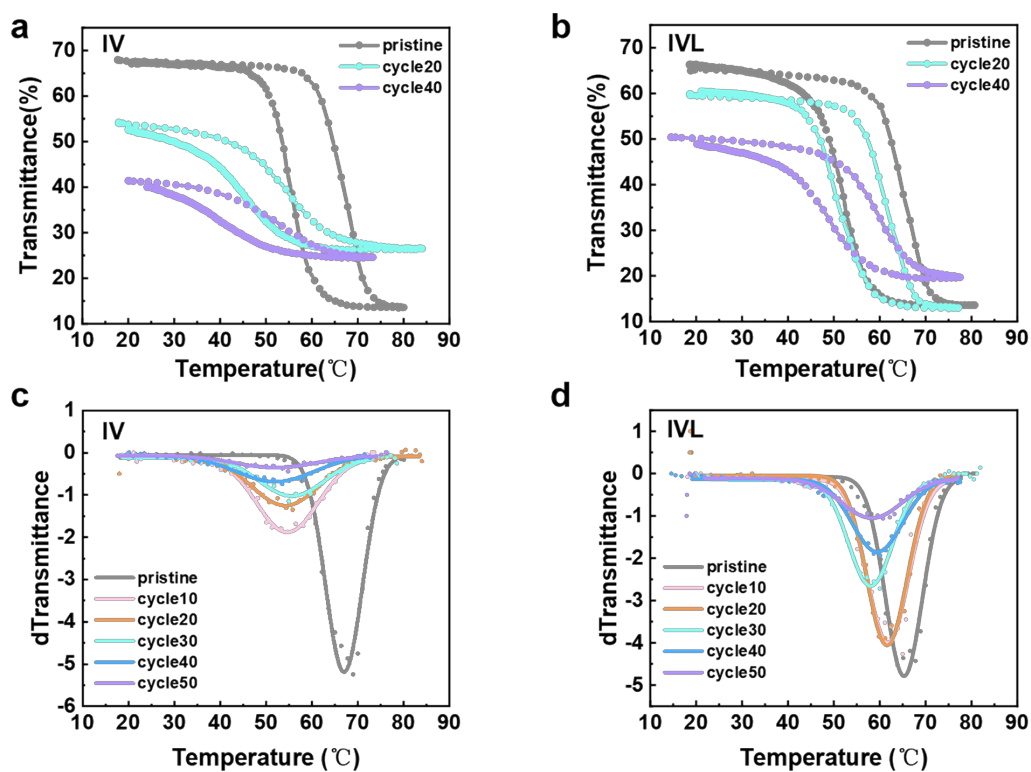

**Fig. S4.** (a) Thermal hysteresis line profiles at 2000 nm for the initial state of IV and (b) IVL after 20 and 40 cycles. (c) First-order differential curves of the thermal hysteresis line for the initial state and each cycling ramp-up phase of IV and (d) IVL. The cycling voltage was  $\pm 2.5$  V and each voltage was maintained for 1 min.
